# Supplementary material
Source: PubMed Central journal article supplement (PMC9792742)

**Table S1. Study group**

| Study Group                                                 | First name   | Last Name    | Titel       | Position                                       | Department                                                                               | Research institute                              | Location |
|-------------------------------------------------------------|--------------|--------------|-------------|------------------------------------------------|------------------------------------------------------------------------------------------|-------------------------------------------------|----------|
| UMC COVID-19 S3/HCW study group                             | Brent        | Appelman     | Dhr, MD     | Arts-onderzoeker                               | Center for Experimental and Molecular Medicine                                           | Amsterdam Infection & Immunity                  | AMC      |
| UMC COVID-19 S3/HCW study group                             | Diederik     | Beek van de  | Dhr, MD PhD | Neuroloog                                      | Neurologie                                                                               | Amsterdam Neuroscience                          | AMC      |
| UMC COVID-19 S3/HCW study group                             | Marije K     | Bomers       | Mw, MD PhD  | Internist-infectioloog                         | Interne Geneeskunde                                                                      | Amsterdam Infection & Immunity                  | VUmc     |
| UMC COVID-19 S3/HCW study group                             | Justin       | Brabander de | Dhr, MD     | Arts-onderzoeker                               | Center for Experimental and Molecular Medicine                                           | Amsterdam Infection & Immunity                  | AMC      |
| UMC COVID-19 S3/HCW study group                             | Matthijs C   | Brouwer      | Dhr, MD PhD | Neuroloog                                      | Neurologie                                                                               | Amsterdam Neuroscience                          | AMC      |
| UMC COVID-19 S3/HCW study group                             | David TP     | Buis         | Dhr, MD     | Arts-onderzoeker                               | Interne Geneeskunde                                                                      | Amsterdam Infection & Immunity                  | VUmc     |
| UMC COVID-19 S3/HCW study group                             | Nora         | Chekrouni    | Mw, MD      | Arts-onderzoeker                               | Neurologie                                                                               | Amsterdam Neuroscience                          | AMC      |
| UMC COVID-19 S3/HCW study group                             | Marit J      | Gils van     | Mw, PhD     | Associate professor                            | Medical Microbiology & Infection prevention                                              | Amsterdam Infection & Immunity                  | AMC      |
| UMC COVID-19 S3/HCW study group                             | Menno D      | Jong de      | Dhr, MD PhD | Prof clinical virology                         | Medical Microbiology & Infection prevention                                              | Amsterdam Infection & Immunity                  | AMC      |
| UMC COVID-19 S3/HCW study group                             | Ayesha HA    | Lavell       | Mw, MD      | Arts-assistent                                 | Interne Geneeskunde                                                                      | Amsterdam Infection & Immunity                  | VUmc     |
| UMC COVID-19 S3/HCW study group                             | Niels        | Mourik van   | Dhr, MD     | Arts-onderzoeker                               | intensive care medicine                                                                  | Amsterdam Infection & Immunity                  | AMC      |
| UMC COVID-19 S3/HCW study group                             | Sabine E     | Olie         | Mw, MD      | Arts-onderzoeker                               | Neurologie                                                                               | Amsterdam Neuroscience                          | AMC      |
| UMC COVID-19 S3/HCW study group                             | Edgar JG     | Peters       | Dhr, MD PhD | Internist-infectioloog                         | Interne Geneeskunde                                                                      | Amsterdam Infection & Immunity                  | VUmc     |
| UMC COVID-19 S3/HCW study group                             | Tom DY       | Reijnders    | Dhr, MD     | Arts-onderzoeker                               | Center for Experimental and Molecular Medicine                                           | Amsterdam Infection & Immunity                  | AMC      |
| UMC COVID-19 S3/HCW study group                             | Michiel      | Schinkel     | Dhr, MD     | Arts-onderzoeker                               | Center for Experimental and Molecular Medicine                                           | Amsterdam Infection & Immunity                  | AMC      |
| UMC COVID-19 S3/HCW study group                             | Alex R       | Schuuman     | Dhr, MD     | Arts-onderzoeker                               | Center for Experimental and Molecular Medicine                                           | Amsterdam Infection & Immunity                  | AMC      |
| UMC COVID-19 S3/HCW study group                             | Jonne J      | Sikkens      | Dhr, MD PhD | Arts-assistent<br>arts-onderzoeker<br>post-doc | Interne Geneeskunde                                                                      | Amsterdam Infection & Immunity                  | VUmc     |
| UMC COVID-19 S3/HCW study group                             | Marleen A    | Slim         | Mw, MD      | Arts-onderzoeker                               | Intensive care medicine                                                                  | Amsterdam Infection & Immunity                  | AMC      |
| UMC COVID-19 S3/HCW study group                             | Yvo M        | Smulders     | Dhr, MD PhD | Prof internal medicine                         | Interne Geneeskunde                                                                      |                                                 | VUmc     |
| UMC COVID-19 S3/HCW study group                             | Alexander PJ | Vlaar        | Dhr, MD PhD | intensivist                                    | Intensive care medicine                                                                  | Amsterdam Infection & Immunity                  | AMC      |
| UMC COVID-19 S3/HCW study group                             | Lonneke A    | Vught van    | Mw, MD PhD  | Post doctoraal onderzoeker                     | Intensive care medicine                                                                  | Amsterdam Infection & Immunity                  | AMC      |
| UMC COVID-19 S3/HCW study group                             |              |              |             |                                                | Center for Experimental and Molecular Medicine                                           |                                                 |          |
| UMC COVID-19 S3/HCW study group                             | W Joost      | Wiersinga    | Dhr, MD PhD | Internist-infectioloog                         | Interne Geneeskunde                                                                      | Amsterdam Infection & Immunity                  | AMC      |
| Fatebenefratelli-Sacco Infectious Diseases Physicians group | Spinello     | Antinori     | Prof        |                                                | Department of Clinical Sciences, Fatebenefratelli<br>III Division of Infectious Diseases | III Division of Infectious Diseases             |          |
| Fatebenefratelli-Sacco Infectious Diseases Physicians group | Cinzia       | Bassoli      | Dr          |                                                | Department of Clinical Sciences, Fatebenefratelli<br>III Division of Infectious Diseases | Fatebenefratelli – Sacco Hospital, Milan, Italy |          |
| Fatebenefratelli-Sacco Infectious Diseases Physicians group | Giovanna     | Bestetti     | Dr          |                                                | III Division of Infectious Diseases                                                      | Fatebenefratelli – Sacco Hospital, Milan, Italy |          |
| Fatebenefratelli-Sacco Infectious Diseases Physicians group | Mario        | Corbellino   | Dr          |                                                | III Division of Infectious Diseases                                                      | Fatebenefratelli – Sacco Hospital, Milan, Italy |          |
| Fatebenefratelli-Sacco Infectious Diseases Physicians group | Alice        | Covizzi      | Dr          |                                                | Department of Clinical Sciences                                                          | Fatebenefratelli – Sacco Hospital, Milan, Italy |          |
| Fatebenefratelli-Sacco Infectious Diseases Physicians group | Angelica     | Lupo         | Dr          |                                                | III Division of Infectious Diseases                                                      | Fatebenefratelli – Sacco Hospital, Milan, Italy |          |
| Fatebenefratelli-Sacco Infectious Diseases Physicians group | Laura        | Milazzo      | Dr          |                                                | III Division of Infectious Diseases                                                      | Fatebenefratelli – Sacco Hospital, Milan, Italy |          |
| Fatebenefratelli-Sacco Infectious Diseases Physicians group | Marco        | Schiama      | Dr          |                                                | Department of Clinical Sciences                                                          | Fatebenefratelli – Sacco Hospital, Milan, Italy |          |
| Fatebenefratelli-Sacco Infectious Diseases Physicians group | Alessandro   | Torre        | Dr          |                                                | III Division of Infectious Diseases                                                      | Fatebenefratelli – Sacco Hospital, Milan, Italy |          |

**Table S2. Detailed description of Cohort 1 - Amsterdam UMC cohort**

| Participant | Age (yrs) | Sex | Antigen experienced | Days between positive PCR and 1st dose | Days between Vaccinations | Serum-Analysis: Days upon 1st (2nd) vaccination                       | Included in IL-6 study |
|-------------|-----------|-----|---------------------|----------------------------------------|---------------------------|-----------------------------------------------------------------------|------------------------|
| 1203        | 40        | f   | Yes                 |                                        | 21                        | 0, 10, 14, 21(0), 25(4), 29(8), 31(10), 42(21), 49(29)                | Yes                    |
| 1182        | 49        | f   |                     |                                        | 21                        | 1, 7, 14, 26(5), 28(7), 30(9), 35(14), 42(21), 49(28)                 |                        |
| 1561        | 26        | f   |                     |                                        | 23                        | 1, 6, 8, 12, 14, 23(0), 26(3), 30(7), 44(21), 51(28)                  | Yes                    |
| 1679        | 23        | f   |                     |                                        | 21                        | 0, 6, 21(0), 49(28)                                                   |                        |
| 1675        | 23        | f   | Yes                 | 287                                    | 21                        | 1, 4, 8, 11, 14, 21(0), 26(5), 28(7), 33(12), 42(21), 49(28)          | Yes                    |
| 1897        | 27        | f   |                     |                                        | 20                        | 0, 12, 15, 20(0), 39(19), 49(29)                                      |                        |
| 1756        | 25        | f   | Yes                 | 275                                    | 21                        | 0, 7, 11, 15, 21(0), 26(5), 28(7), 32(11), 35(14), 43(22), 49(28)     | Yes                    |
| 1602        | 36        | f   | Yes                 | 64                                     | 21                        | 0, 2, 9, 13, 21(0), 23(2), 28(7), 34(13), 49(28)                      | Yes                    |
| 1264        | 62        | m   |                     |                                        | 21                        | 0, 3, 7, 10, 11, 14, 21(0), 24(3), 29(8), 31(10), 36(15), 49(28)      | Yes                    |
| 1476        | 51        | f   |                     |                                        | 21                        | 0, 4, 7, 11, 15, 21(0), 25(4), 28(7), 33(12), 36(15), 43(22), 49(28)  | Yes                    |
| 1507        | 60        | f   |                     |                                        | 21                        | 1, 5, 7, 9, 14, 21(0), 28(7), 30(9), 35(14), 42(21), 49(28)           | Yes                    |
| 1946        | 59        | m   |                     |                                        | 22                        | -4, 2, 7, 10, 14, 21, 24(2), 30(8), 38(16), 44(22), 49(27)            | Yes                    |
| 1950        | 37        | f   |                     |                                        | 21                        | 1, 5, 7, 14, 21(0), 23(2), 27(6), 36(15), 42(21), 49(28)              |                        |
| 1540        | 43        | f   |                     |                                        | 22                        | 1, 7, 9, 14, 22(0), 26(4), 28(6), 34(12), 37(15), 50(28)              | Yes                    |
| 1130        | 34        | m   |                     |                                        | 22                        | 1, 5, 7, 14, 22(0), 26(4), 29(7), 33(11), 36(14), 44(22), 50(28)      |                        |
| 1109        | 57        | m   |                     |                                        | 21                        | 1, 7, 9, 14, 21(0), 26 (5), 29(8), 35 (14), 42(21), 50(29)            | Yes                    |
| 1073        | 30        | f   | Yes                 | 57                                     | 23                        | 1, 8, 13, 23 (0), 30(7), 36(13), 49(26)                               |                        |
| 1169        | 44        | f   |                     |                                        | 24                        | 3, 7, 10, 14, 21, 27(3), 31(7), 34(10), 38(14), 49(25)                | Yes                    |
| 1949        | 38        | f   |                     |                                        | 21                        | 0, 3, 7, 13, 21(0), 24(3), 28(7), 31(10), 35(14), 49(28)              |                        |
| 1317        | 39        | f   |                     |                                        | 21                        | 0, 3, 7, 11, 21(0)                                                    |                        |
| 1291        | 29        | m   |                     |                                        | 21                        | 0, 5, 8, 13, 15, 21(0), 27(6), 32(11), 48(27)                         | Yes                    |
| 1992        | 61        | f   |                     |                                        | 22                        | 0, 4, 5, 8, 11, 15, 22(0), 25(3), 29(7), 32(10), 41(19), 49(27)       | Yes                    |
| 1725        | 43        | f   |                     |                                        | 21                        | 0, 4, 7, 14, 21(0), 25(4), 29(8), 34(13), 42(21), 49(28)              |                        |
| 1219        | 25        | f   |                     |                                        | 21                        | 1, 5, 7, 9, 21(0), 23(2), 28(7), 30(9), 35(14), 42(21), 49(28)        |                        |
| 1987        | 30        | f   |                     |                                        | 21                        | 1, 5, 7, 14, 21(0), 26(5), 28(7), 30(9), 35(14), 42(21), 49(28)       |                        |
| 1361        | 51        | f   |                     |                                        | 21                        | 0, 4, 6, 11, 14, 21(0), 25(4), 32(11), 36(15), 42(21), 49(28)         |                        |
| 1844        | 57        | m   |                     |                                        | 21                        | 0, 4, 7, 12, 14, 21(0), 26(5), 29(8), 35(14), 49(28)                  | Yes                    |
| 1321        | 27        | m   |                     |                                        | 22                        | 0, 8, 11, 15, 22(0), 29(7), 32(10), 43(21), 49(28)                    | Yes                    |
| 1122        | 64        | f   |                     |                                        | 21                        | 1, 5, 8, 12, 14, 21(0), 23(2), 28 (7), 30 (9), 36(15), 42(21), 50(29) | Yes                    |
| 1750        | 59        | f   |                     |                                        | 22                        | 1, 7, 14, 22(0), 26(4), 33(11), 35(13), 50(28)                        |                        |
| 1338        | 47        | f   |                     |                                        | 21                        | 1, 6, 11, 13, 21(0), 25(4), 27(6), 33(12), 42(21), 49(28)             | Yes                    |

|             |    |   |     |     |    |                                                                      |     |
|-------------|----|---|-----|-----|----|----------------------------------------------------------------------|-----|
| <b>1857</b> | 36 | f |     |     | 22 | 0, 12, 22(0), 25(3), 36(14), 49(27)                                  |     |
| <b>1249</b> | 46 | m |     |     | 21 | 1, 5, 7, 9, 14, 21(0), 26(5), 28(7), 30(9), 35(14), 50(29)           | Yes |
| <b>1473</b> | 44 | m |     |     | 22 | 0, 6, 13, 22(0), 29(7), 36(14), 49(27)                               |     |
| <b>1485</b> | 39 | m |     |     | 21 | 1, 5, 9, 13, 21(0), 23(2), 27(6), 42(21), 48(27)                     | Yes |
| <b>1738</b> | 40 | m |     |     | 21 | 0, 3, 5, 10, 14, 21(9), 24(3), 26(5), 32(11), 34(13), 42(21), 49(28) | Yes |
| <b>1757</b> | 33 | f | Yes | 288 | 20 | 0, 4, 7, 11, 14, 20(0), 22(2), 35(15), 49(27)                        | Yes |
| <b>1902</b> | 34 | m |     |     | 22 | 0, 4, 11, 15, 22(0), 35(13), 41(19), 49(27)                          |     |
| <b>1953</b> | 46 | f |     |     | 21 | 0, 4, 6, 10, 14, 19, 24(3), 27(6), 32(11), 35(14), 42(21), 49(28)    | Yes |

**Table S3. Detailed description of Cohort 2 - Fatebenefratelli-Sacco Infectious Diseases Physicians Group**

| Participant | Age (yrs) | Sex | Days between first and second dose | BMI | Cormobidities                                           | Medications                | Serum-Analysis: Days upon 1st (2nd) dose                                  |
|-------------|-----------|-----|------------------------------------|-----|---------------------------------------------------------|----------------------------|---------------------------------------------------------------------------|
| VC-001      | 58        | M   | 21                                 | 26  | None                                                    | None                       | 0, 3, 7, 11, 14, 17, 21(0), 24(3), 28(7), 32(11), 35(14), 39(18), 42(21)  |
| SCM         | 28        | M   | 21                                 | 21  | None                                                    | None                       | 0, 4, 8, 11, 15, 18, 21(0), 25(4), 29(8), 31(10), 36(15), 39(18), 42(21)  |
| TOA         | 35        | M   | 21                                 | 23  | None                                                    | None                       | -1, 3, 7, 10, 14, 17, 20, 24(3), 28(7), 30(9), 35(14), 38(17), 41(20)     |
| ANSP        | 62        | M   | 21                                 | 24  | Hypertension<br>Hereditary spherocytosis<br>splenectomy | Olmesartan<br>Esomeprazole | 0, 4, 8, 11, 15, 18, 22(1), 25(4), 29(8), 32(11), 35(14), 43(22), 45(24)  |
| COA         | 28        | F   | 21                                 | 21  | None                                                    | None                       | -1, 3, 6, 10, 13, 17, 20, 24(3), 27(6), 31(10), 34(13), 38(17), 41(20)    |
| BAC         | 29        | F   | 21                                 | 19  | None                                                    | None                       | -1, 3, 6, 10, 13, 17, 20, 25(4), 27(6), 31(10), 34(13), 38(17), 41(20)    |
| LUAN        | 59        | F   | 21                                 | 31  | Hypertension                                            | Ramipril                   | 0, 4, 8, 11, 15, 18, 22(1), 25(4), 32(11), 34(13), 36(15), 39(18), 43(22) |
| MIL         | 53        | F   | 21                                 | 19  | Breast Cancer                                           | Aromasin                   | -1, 2, 6, 9, 13, 16, 20, 23(2), 27(6), 30(9), 34(13), 37(16), 41(20)      |
| BEGI        | 55        | F   | 21                                 | 29  | None                                                    | None                       | 0, 3, 7, 10, 14, 17, 21, 24(3), 28(7), 31(10), 35(14), 38(17), 42(21)     |

Table S4. Detailed description of Cohort 3 - Luebeck cohort

| Participant | Individual numbers<br>Lixenfeld <i>et al.</i> | Age<br>(yr) | Sex | Ag-<br>experienced | Days between PCR-positive/<br>symptoms and 1st vaccination | Controls | Vaccine         | Days<br>between<br>vaccinations | Serum Analysis:<br>Days upon 1st (2nd)<br>vaccination | Serum and Blood Cell Analysis:<br>Days upon 1st (2nd) vaccination |
|-------------|-----------------------------------------------|-------------|-----|--------------------|------------------------------------------------------------|----------|-----------------|---------------------------------|-------------------------------------------------------|-------------------------------------------------------------------|
| 1           | 1                                             | 37          | m   |                    |                                                            |          | BioNTech/Pfizer | 35                              | -2, 22, 40 (5), 70 (35)                               |                                                                   |
| 2           | 2                                             | 30          | f   |                    |                                                            |          | BioNTech/Pfizer | 35                              | 0, 24, 41 (6), 65 (30)                                |                                                                   |
| 3           | 3                                             | 43          | f   |                    |                                                            |          | BioNTech/Pfizer | 35                              | 0, 23, 31, 41 (5), 64 (28)                            |                                                                   |
| 4           | 4                                             | 29          | f   |                    |                                                            |          | BioNTech/Pfizer | 35                              | 0, 23, 42 (7), 64 (29)                                |                                                                   |
| 5           | 5                                             | 32          | f   |                    |                                                            |          | BioNTech/Pfizer | 35                              | 0, 23, 41 (6), 64 (29)                                |                                                                   |
| 6           | 6                                             | 28          | f   |                    |                                                            |          | BioNTech/Pfizer | 35                              | 0, 31, 41 (6), 64 (29)                                |                                                                   |
| 7           | 7                                             | 34          | f   |                    |                                                            |          | BioNTech/Pfizer | 35                              | 0, 31, 42 (7)                                         |                                                                   |
| 8           | 8                                             | 29          | m   |                    |                                                            |          | BioNTech/Pfizer | 35                              | 0, 24, 41 (6), 64 (29)                                |                                                                   |
| 10          | 10                                            | 33          | m   |                    |                                                            |          | BioNTech/Pfizer | 35                              | 0, 23, 41 (6), 64 (29)                                |                                                                   |
| 12          | 12                                            | 25          | f   |                    |                                                            |          | BioNTech/Pfizer | 35                              | 0, 41 (6), 63 (28)                                    |                                                                   |
| 13          | 13                                            | 42          | m   |                    |                                                            |          | BioNTech/Pfizer | 35                              | 0, 23, 41 (6), 63 (28)                                |                                                                   |
| 14          | 14                                            | 31          | m   |                    |                                                            |          | BioNTech/Pfizer | 35                              | 0, 23, 40 (5), 64 (29)                                |                                                                   |
| 15          | 15                                            | 30          | m   |                    |                                                            |          | BioNTech/Pfizer | 35                              | 0, 23, 43 (8), 64 (29)                                |                                                                   |
| 16          | 16                                            | 52          | m   |                    |                                                            |          | BioNTech/Pfizer | 35                              | 0, 30, 41 (6), 63 (28)                                |                                                                   |
| 17          | 17                                            | 26          | f   |                    |                                                            |          | BioNTech/Pfizer |                                 | 4, 14, 21                                             |                                                                   |
| 18          | 18                                            | 26          | f   |                    |                                                            |          | BioNTech/Pfizer | 34                              | 9, 17, 24, 37 (3), 50 (16)                            |                                                                   |
| 19          | 19                                            | 30          | f   |                    |                                                            |          | BioNTech/Pfizer |                                 | 6, 12                                                 |                                                                   |
| 20          | 20                                            | 22          | f   |                    |                                                            | x        | no              |                                 |                                                       |                                                                   |
| 21          | 21                                            | 29          | m   | yes                | 305                                                        |          | BioNTech/Pfizer | 35                              | -2, 22, 29, 40 (5), 62 (27)                           | 40 (5)                                                            |
| 22          | 22                                            | 29          | f   | yes                | 290                                                        |          | BioNTech/Pfizer | 35                              | 0, 22, 30, 40 (5), 63 (28)                            | 40 (5)                                                            |
| 51          |                                               | 46          | m   |                    |                                                            |          | BioNTech/Pfizer |                                 |                                                       | 13                                                                |
| 52          |                                               | 44          | f   |                    |                                                            |          | BioNTech/Pfizer |                                 |                                                       | 13                                                                |
| 53          |                                               | 37          | m   |                    |                                                            |          | BioNTech/Pfizer |                                 |                                                       | 13                                                                |
| 54          |                                               | 33          | f   |                    |                                                            |          | BioNTech/Pfizer |                                 |                                                       | 10, 14                                                            |
| 55          |                                               | 23          | f   |                    |                                                            |          | BioNTech/Pfizer |                                 |                                                       | 11                                                                |
| 56          |                                               | 19          | m   |                    |                                                            |          | BioNTech/Pfizer |                                 |                                                       | 10                                                                |
| 57          |                                               | 40          | f   | yes                | 173                                                        |          | BioNTech/Pfizer |                                 |                                                       | 10                                                                |
| 58          |                                               | 56          | m   | yes                | 194                                                        |          | BioNTech/Pfizer |                                 |                                                       | 9                                                                 |
| 59          |                                               | 52          | f   | yes                | 165                                                        |          | BioNTech/Pfizer | 35                              |                                                       | 40 (5)                                                            |
| 60          |                                               | 69          | m   | yes                | 158                                                        |          | BioNTech/Pfizer | 32                              |                                                       | 40 (8)                                                            |
| 61          |                                               | 74          | f   | yes                | 184                                                        |          | BioNTech/Pfizer |                                 |                                                       | 8                                                                 |

|    |  |    |   |     |     |   |                 |  |  |   |
|----|--|----|---|-----|-----|---|-----------------|--|--|---|
| 62 |  | 47 | m | yes | 178 |   | BioNTech/Pfizer |  |  | 7 |
| 63 |  | 39 | f | yes | 178 |   | BioNTech/Pfizer |  |  | 7 |
| 64 |  | 29 | f |     |     | x | no              |  |  |   |
| 65 |  | 28 | m |     |     | x | no              |  |  |   |
| 66 |  | 23 | f |     |     | x | no              |  |  |   |
| 67 |  | 21 | f |     |     | x | no              |  |  |   |
| 68 |  | 20 | f |     |     | x | no              |  |  |   |
| 69 |  | 33 | m |     |     | x | no              |  |  |   |
| 70 |  | 34 | f |     |     | x | no              |  |  |   |

**Table S5. Detailed description of Cohort 4 - Convalescent plasma donors**

| <b>Participant</b> | <b>Age (yrs)</b> |
|--------------------|------------------|
| 70826              | 48               |
| 511828             | 56               |
| 553113             | 44               |
| 616886             | 49               |
| 632961             | 62               |
| 659201             | 41               |
| 1086369            | 53               |
| 1217364            | 49               |
| 1218801            | 59               |
| 1339188            | 47               |
| 1832436            | 30               |
| 1878273            | 28               |
| 1937124            | 27               |
| 1972705            | 51               |
| 2177185            | 25               |
| 2198851            | 60               |
| 2394658            | 35               |
| 2402217            | 45               |
| 2408917            | 57               |
| 2411367            | 59               |
| 2412091            | 19               |
| 2427249            | 25               |

Table S6. IgG1 glycopeptides included in the final analyte list

| Glycan composition | Alternative nomenclature | [M+2H] <sup>2+</sup> | [M+3H] <sup>3+</sup> | Proposed structure                                                                  |
|--------------------|--------------------------|----------------------|----------------------|-------------------------------------------------------------------------------------|
| H3N4F1             | G0F                      | 1317.527             | 878.687              |    |
| H4N4               | G1                       | 1325.524             | 884.018              |    |
| H4N4F1             | G1F                      | 1398.553             | 932.704              |    |
| H5N4               | G2                       | 1406.550             | 938.036              |    |
| H5N4F1             | G2F                      | 1479.579             | 986.722              |    |
| H5N4S1             | G2S                      | 1552.098155          | 1035.068             |    |
| H5N5F1S1           | G2FNS                    | 1726.667             | 1151.447             |    |
| H5N4F1S2           | G2FS2                    | 1770.675             | 1180.786             |    |
| H4N5F1             | G1FN                     | 1000.398             | 1500.093             |   |
| H4N4F1S1           | G1FS                     | 1029.736224          | 1544.101             |  |
| H5N5F1             | G2FN                     | 1054.415             | 1581.119             |  |
| H5N4F1S1           | G2FS                     | 1083.753832          | 1625.127             |  |



**Table S7. Description and calculation of IgG1 glycosylation traits. H: hexose, N: N-acetylhexosamine, F: fucose, S: N-acetylneuraminic (sialic) acid**

|                             | <b>Description</b>                                                     | <b>Formula</b>                                                                                                                                                   |
|-----------------------------|------------------------------------------------------------------------|------------------------------------------------------------------------------------------------------------------------------------------------------------------|
| <b>IgG1 bisection</b>       | <i>N</i> -glycans carrying a bisected <i>N</i> -acetylglucosamine      | $( H5N5F1S1 + H4N5F1 + H5N5F1 ) / \text{sum of all IgG1 glycopeptides}$                                                                                          |
| <b>IgG1 galactosylation</b> | <i>N</i> -glycans carrying galactose(s)                                | $( 1/2 * ( H4N4 + H4N4F1 + H4N5F1 + H4N4F1S1 ) + 2/2 * ( H5N4 + H5N4F1 + H5N4S1 + H5N5F1S1 + H5N4F1S2 + H5N5F1 + H5N4F1S1 ) ) / \text{sum of all glycopeptides}$ |
| <b>IgG1 sialylation</b>     | <i>N</i> -glycans carrying <i>N</i> -acetylneuraminic (sialic) acid(s) | $( 1/2 * ( H5N4S1 + H5N5F1S1 + H4N4F1S1 ) + 2/2 * H5N4F1S2 ) / \text{sum of all IgG1 glycopeptides}$                                                             |
| <b>IgG1 fucosylation</b>    | <i>N</i> -glycans carrying a core fucose                               | $( H3N4F1 + H4N4F1 + H5N4F1 + H5N5F1S1 + H5N4F1S2 + H4N5F1 + H4N4F1S1 + H5N5F1S1 + H5N4F1S1 ) / \text{sum of all IgG1 glycopeptides}$                            |

# Supplementary figure 1

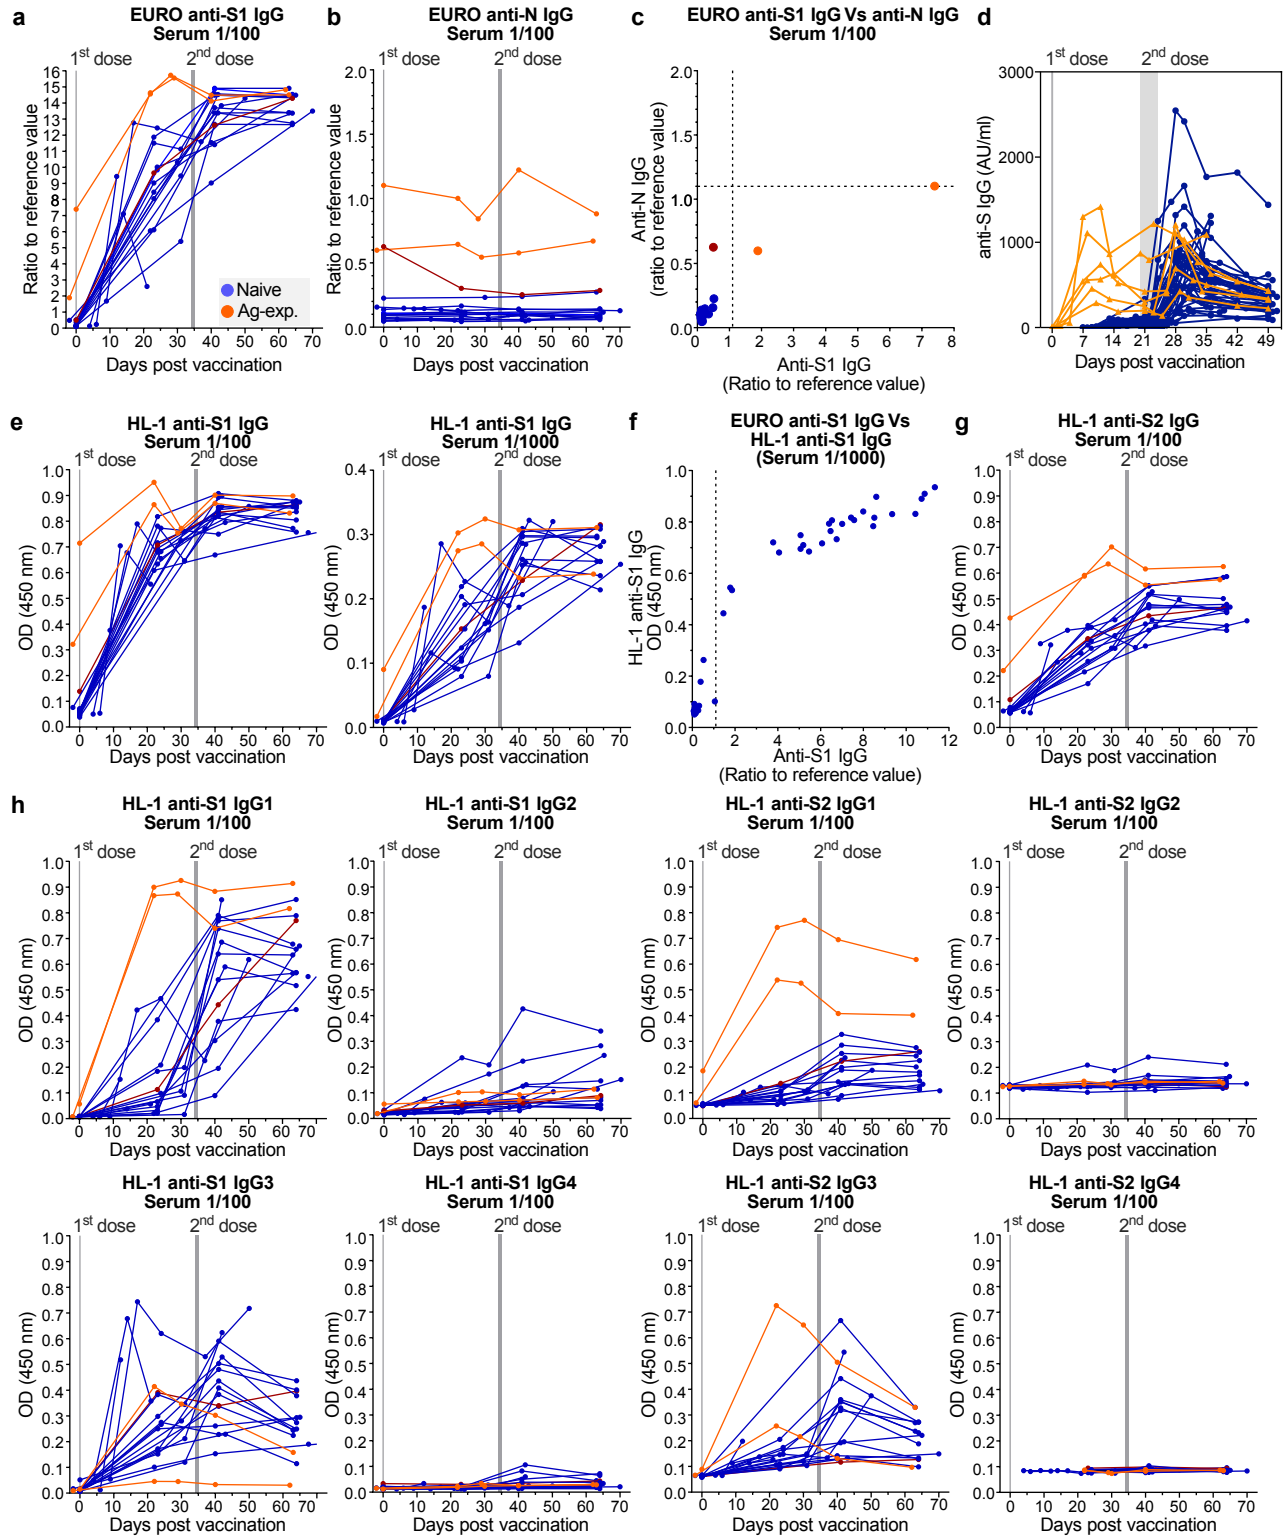

## Supplementary figure 2

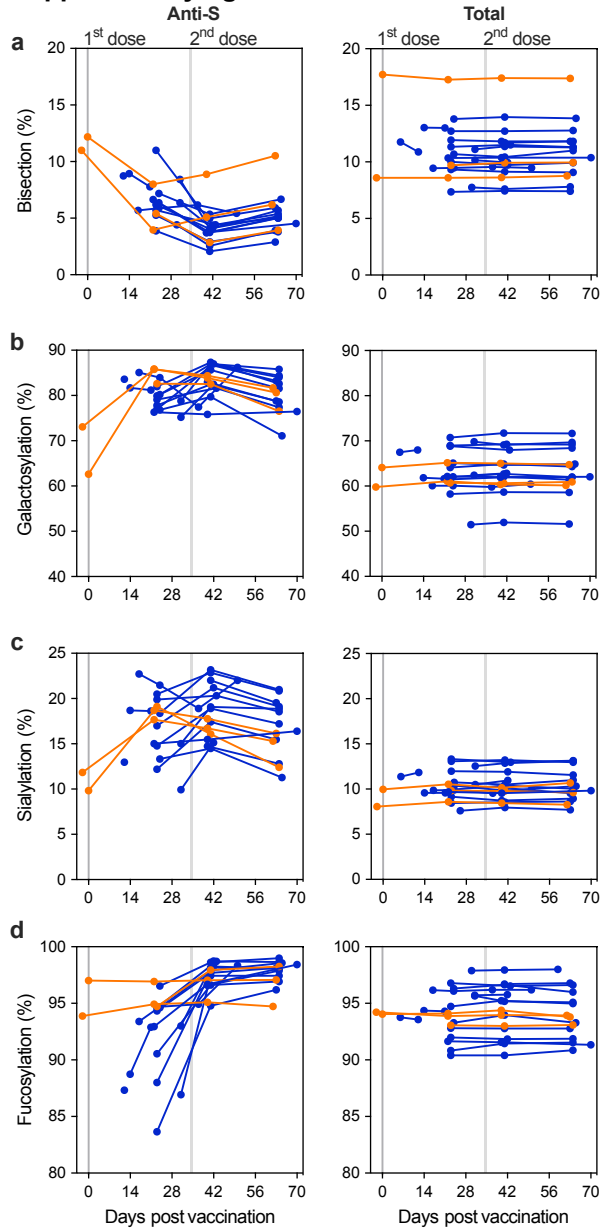

### Supplementary figure 3

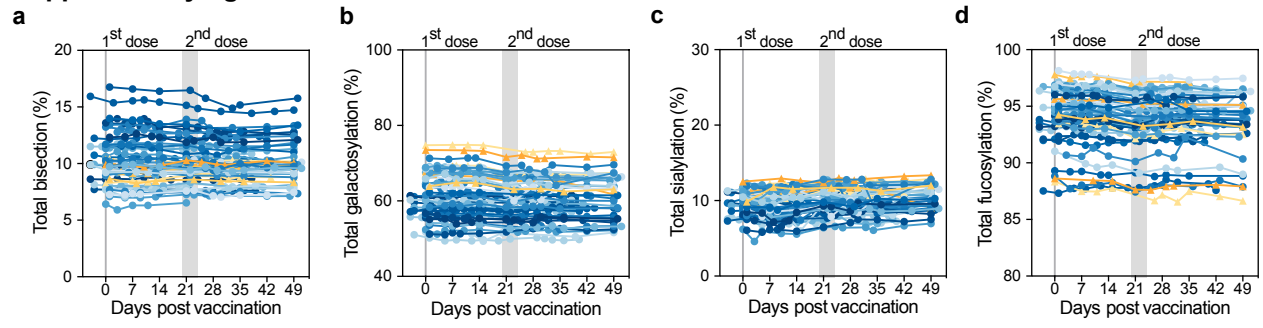

### Supplementary figure 4

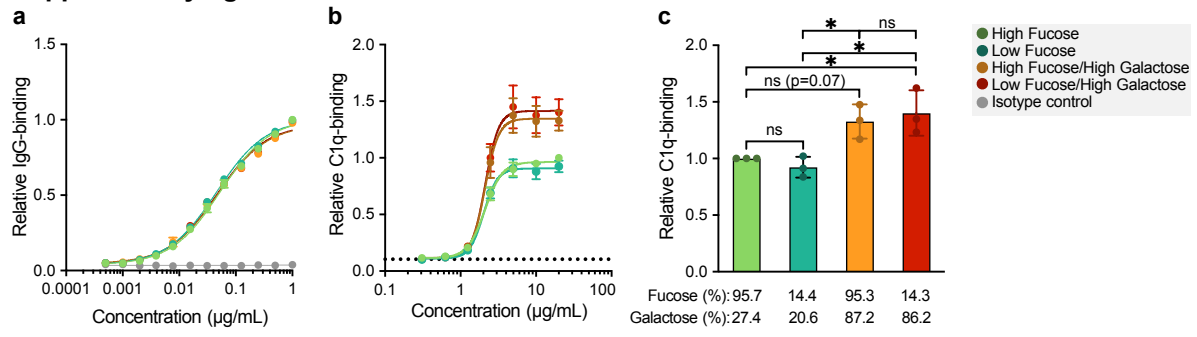

### Supplementary figure 5

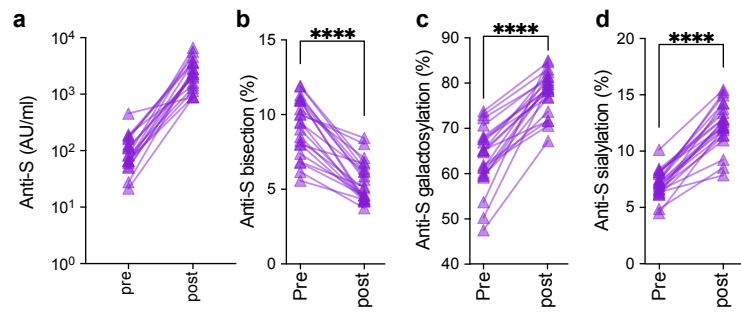

# Supplementary figure 6

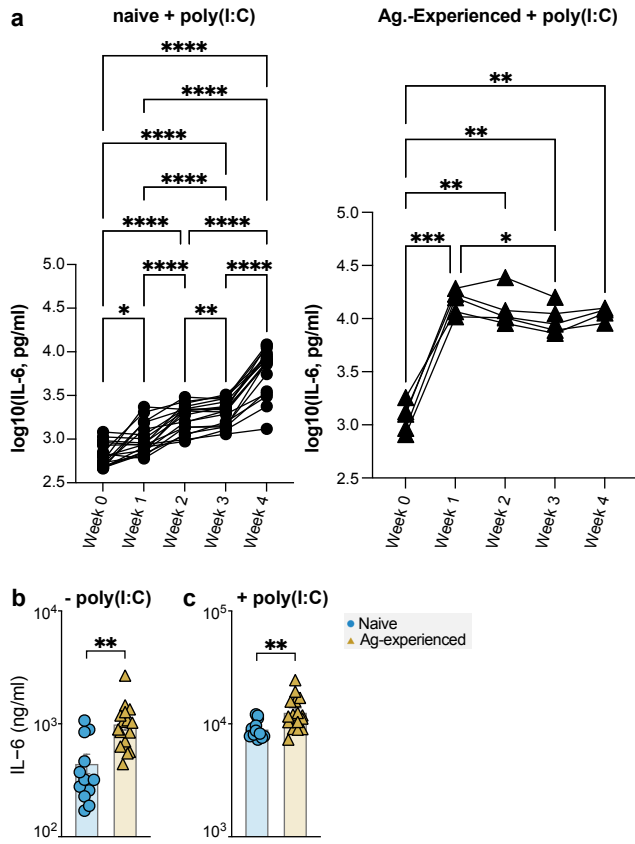

# Supplementary figure 7

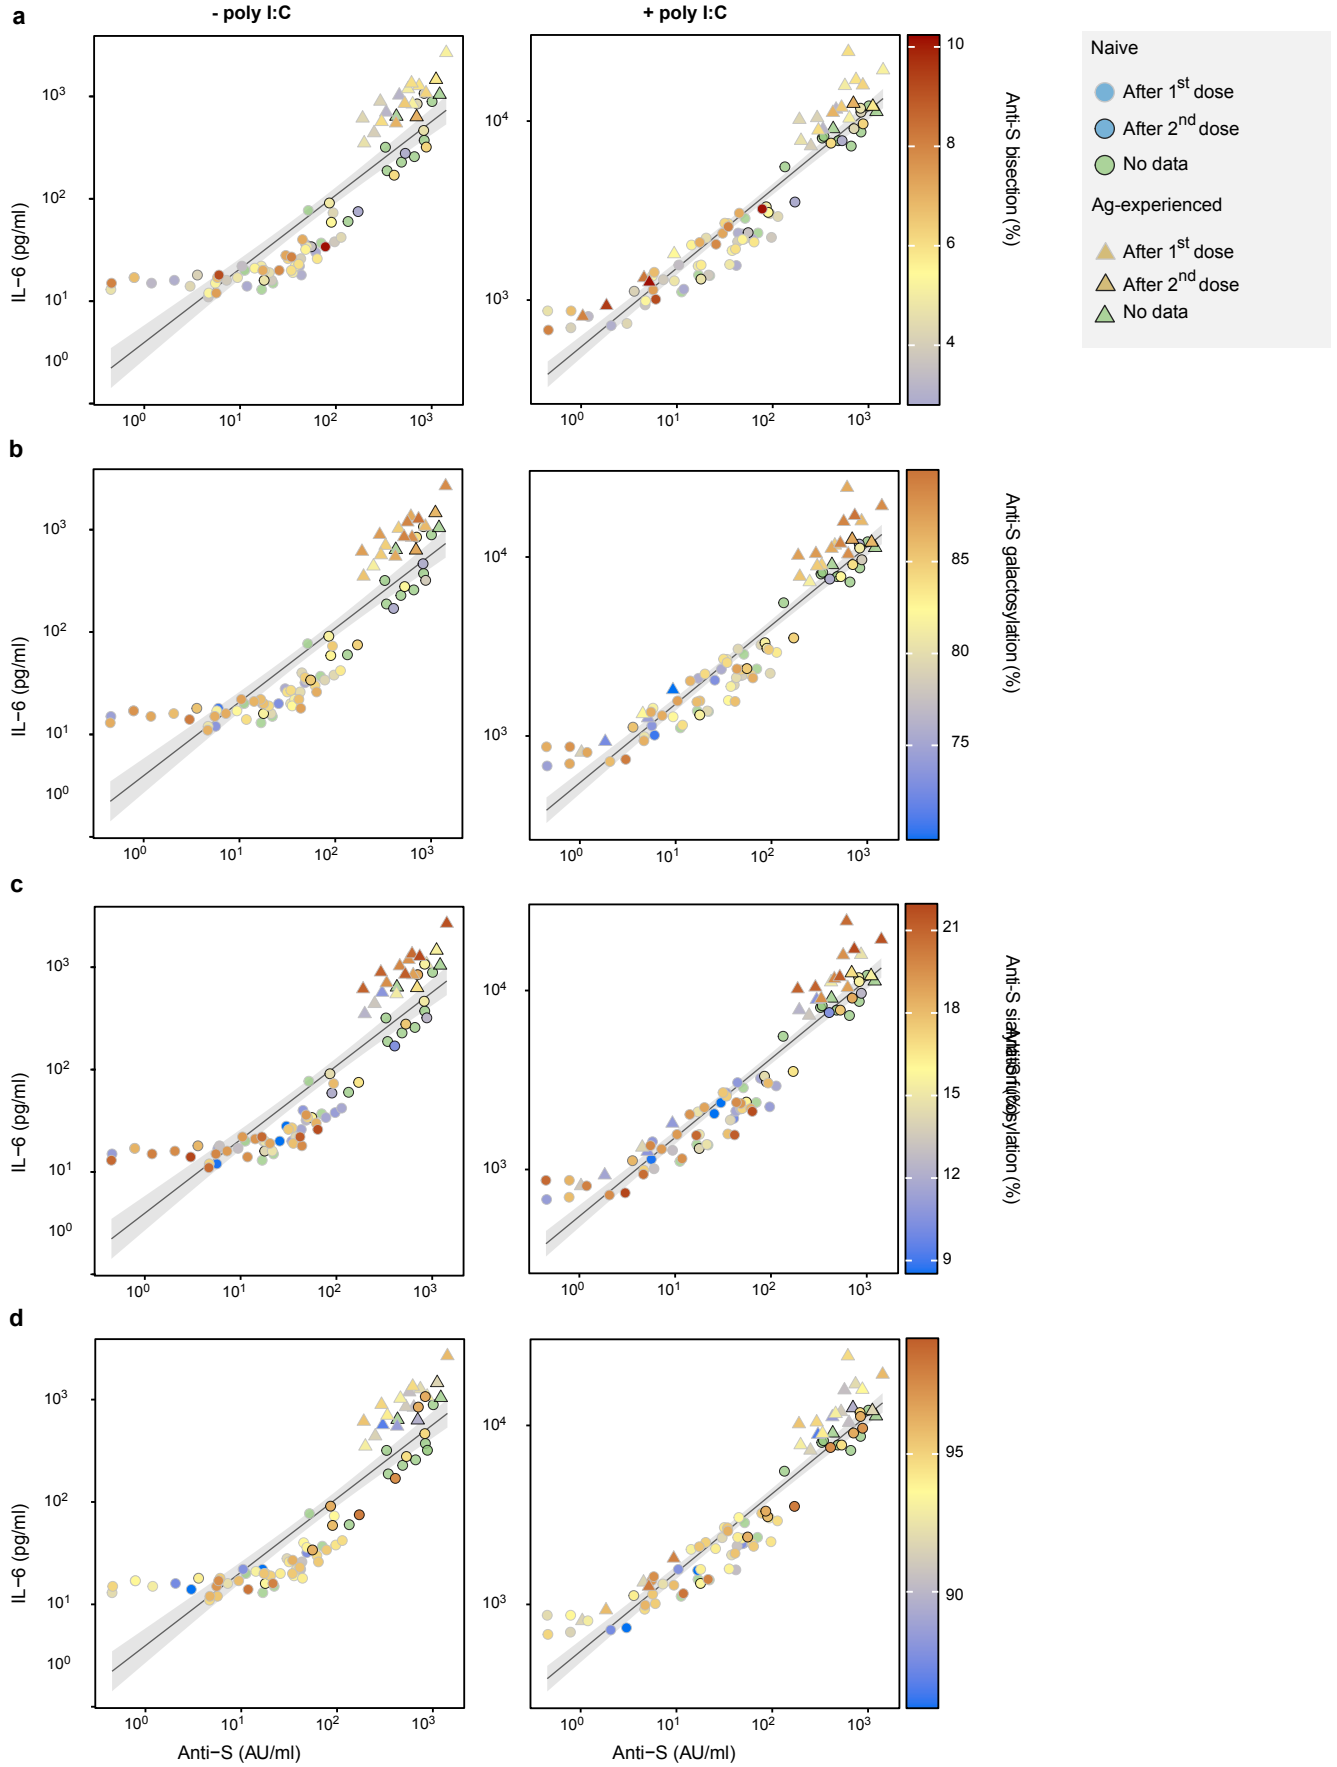



### Supplementary figure 8

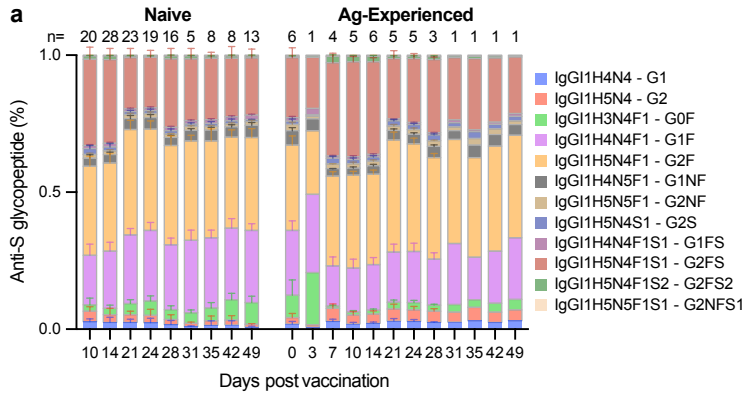

# Supplementary figure 9

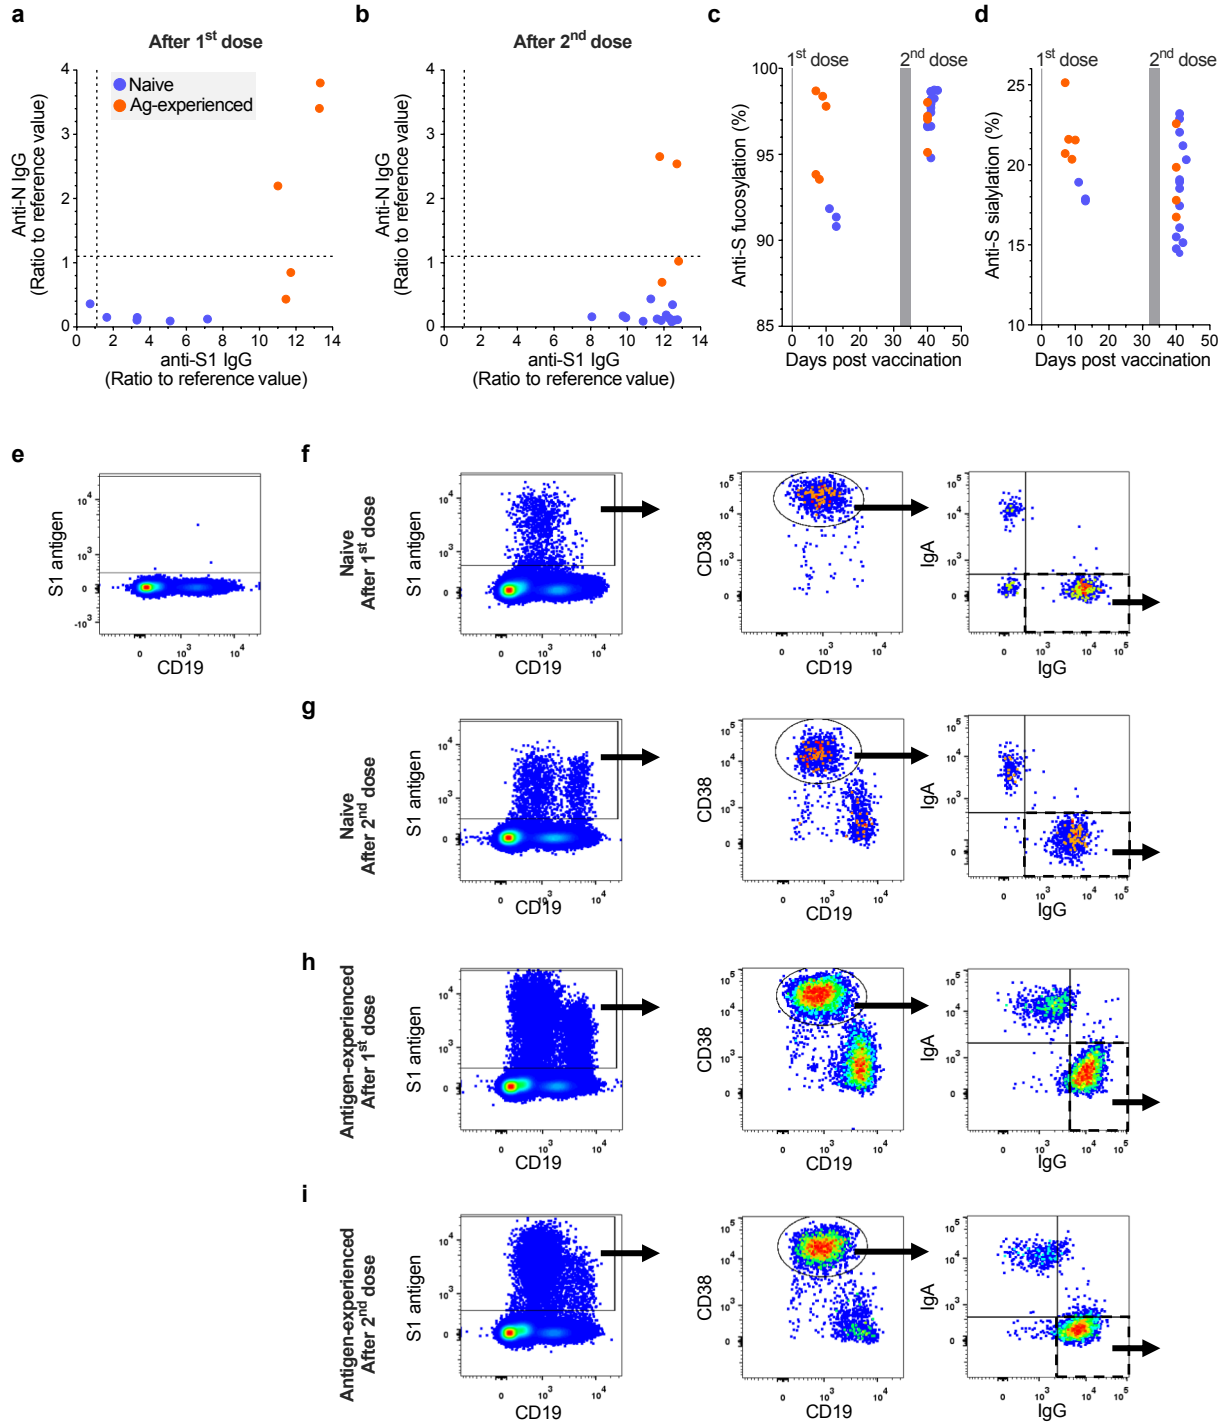

**Supplementary figure 10**

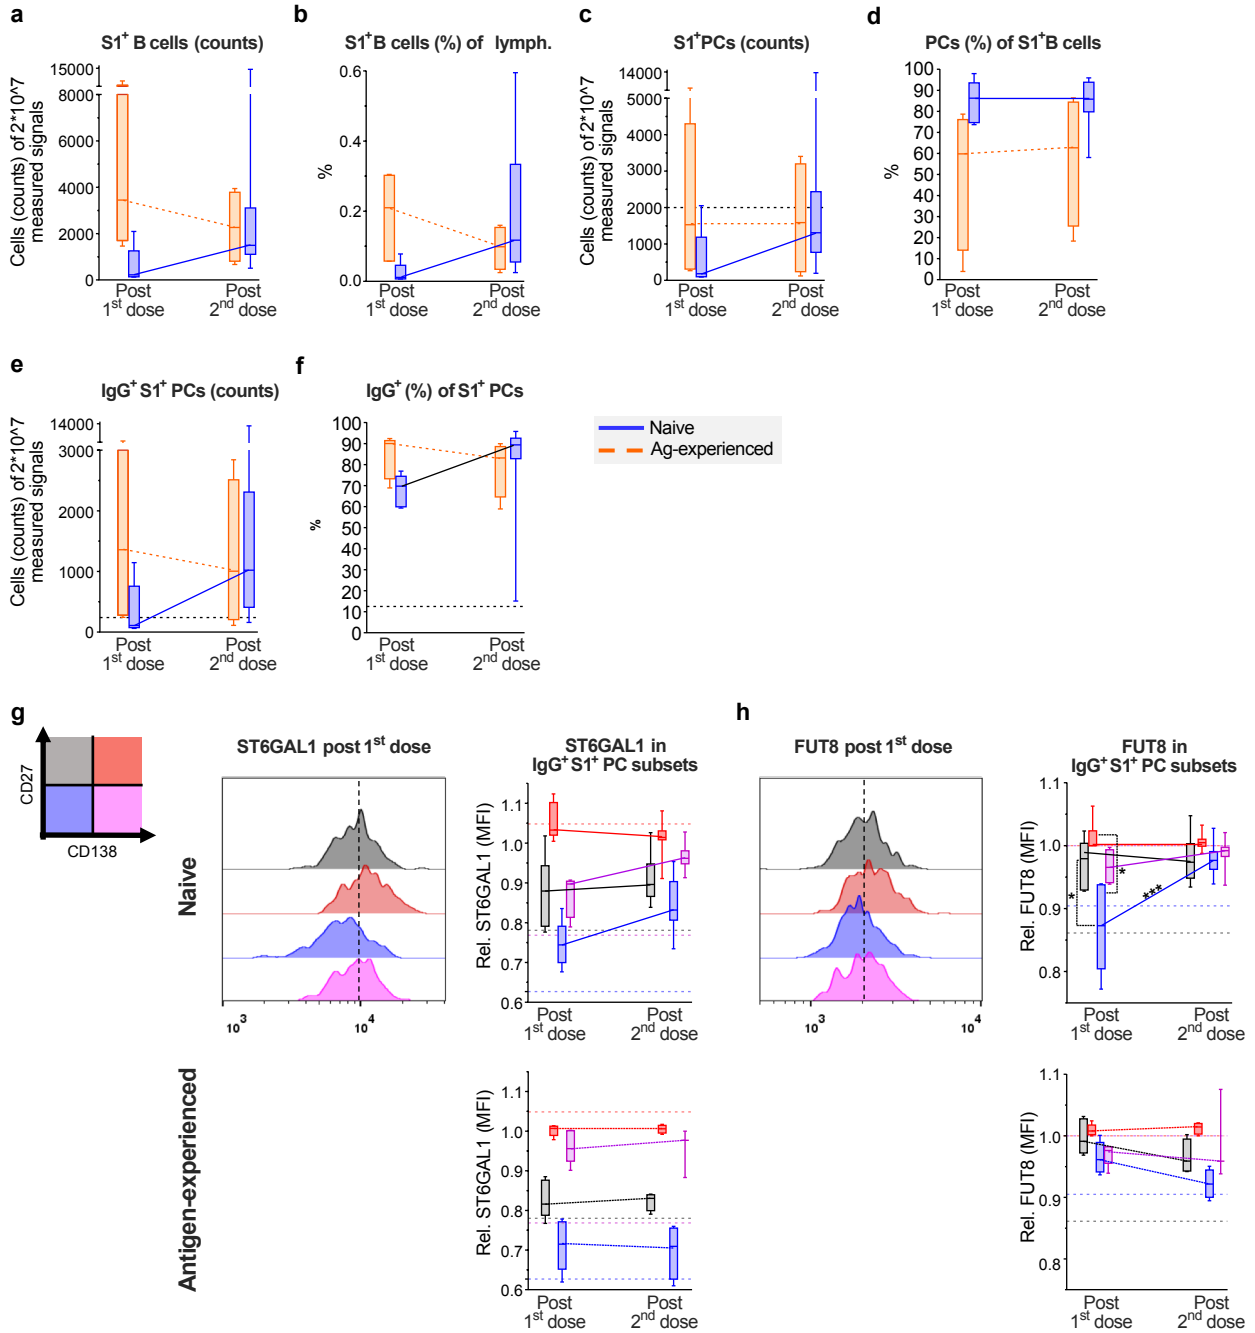

Supplementary figure 11

a

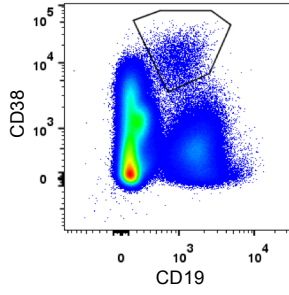

b

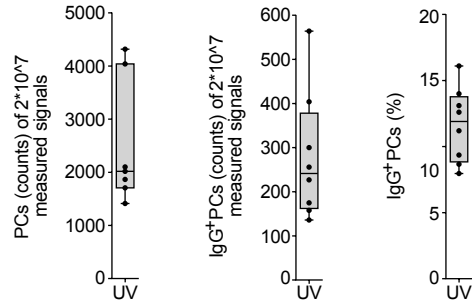

c

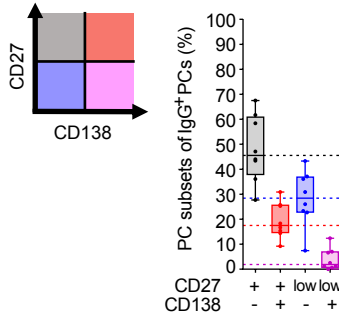

d

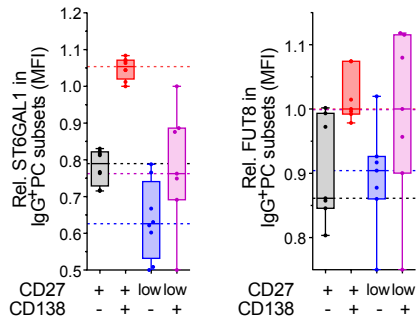

**Supplementary figure 12**

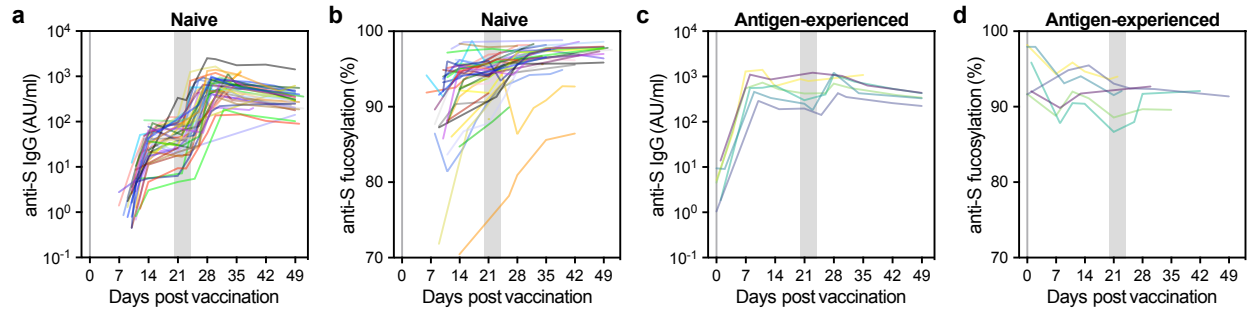

### Supplementary figure 13

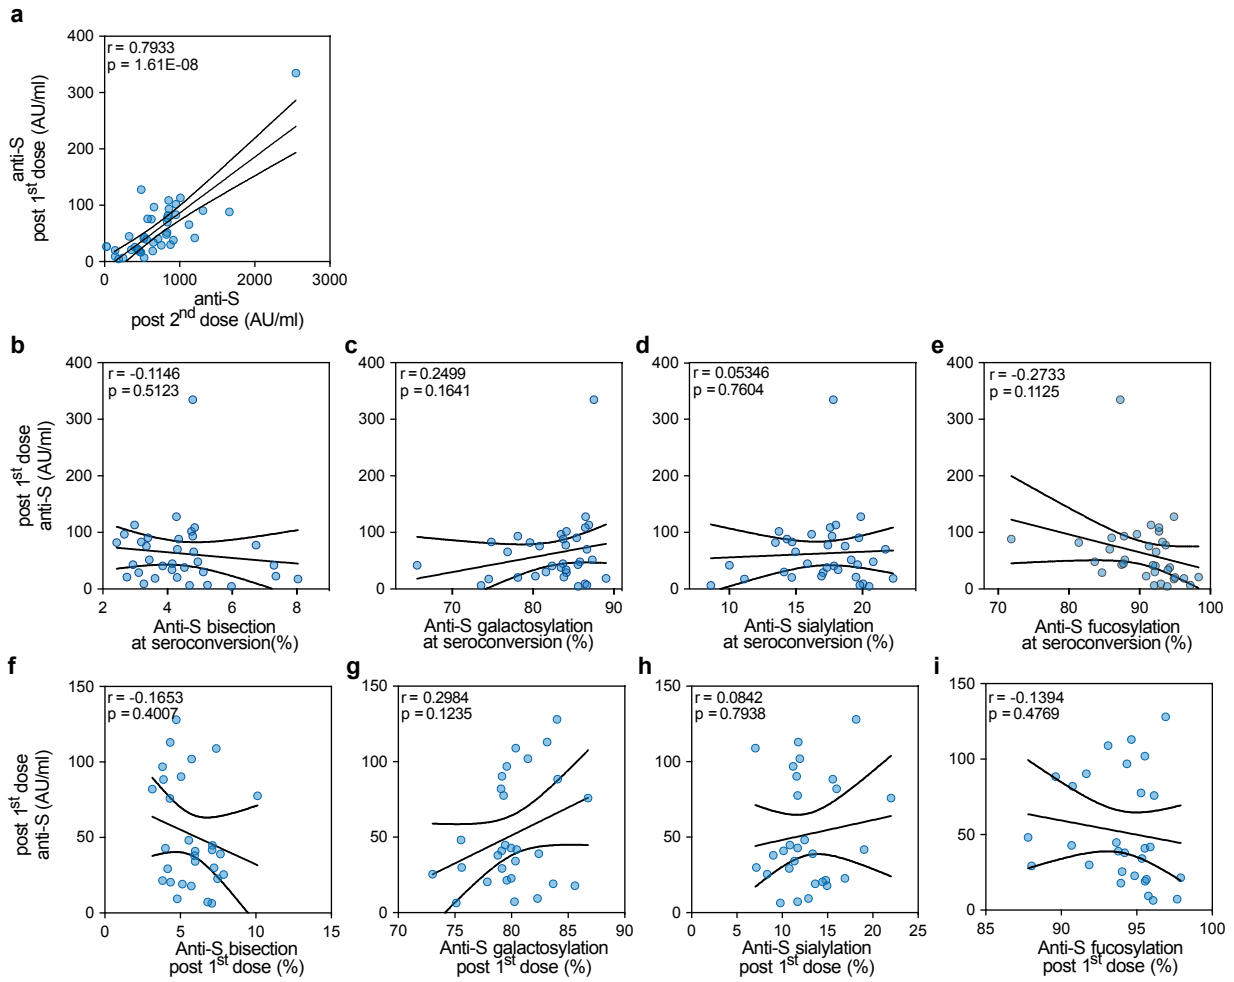

Supplement: mmc2.pdf [file mmc2.pdf]
